# Supplementary material for: Mechanism of methanol synthesis from CO2 on Cu/CeO2 and Cu/W-CeO2: a DFT investigation into the nature of W-doping
Source: Royal Society of Chemistry journal article supplement (doi:10.1039/d3ta06569c), 2023-12-14
Supplement: d3ta06569c1.pdf [file d3ta06569c1.pdf]

## Supporting Information

### **Mechanism of methanol synthesis from CO<sub>2</sub> on Cu/CeO<sub>2</sub> and Cu/ W- CeO<sub>2</sub>: A DFT investigation into the nature of W-doping**

*Nana Ma,<sup>\*,a</sup> Weiyi Cheng,<sup>a</sup> Changgeng Wei,<sup>b</sup> Shujun Li,<sup>a</sup> and Guisheng Zhang<sup>\*,a</sup>*

<sup>a</sup>School of Chemistry and Chemical Engineering, Key Laboratory of Green Chemical Media and Reactions, Ministry of Education; NMPA Key Laboratory for Research and Evaluation of Innovative Drug, Henan Normal University, Xinxiang, Henan, 453007, China. E-mail: mann076@htu.edu.cn; zgs6668@yahoo.com.

<sup>b</sup>Bremen Center for Computational Materials Science, University of Bremen, 28359, Bremen, Germany.

## Content

**Figure S1.** The most stable structure of  $\text{Cu}_n$  ( $n = 1-10$ ) clusters anchored at different sites on the surface of  $\text{CeO}_2\text{-O}_v$ .

**Figure S2.** Most stable configuration for the chemisorption of  $\text{CO}_2$  molecules at the  $\text{Cu}_n/\text{CeO}_2\text{-O}_v$  interface.

**Figure S3.** Geometric structure and adsorption energy of  $\text{Cu}_8$  on stoichiometric and partially reduced  $\text{CeO}_2$  surfaces.

**Figure S4.** The nine most stable geometries of W-doping on  $\text{Cu}_8/\text{W-CeO}_2\text{-O}_v$ .

**Figure S5.** Top and side view of the optimized structures of the initial state (IS), transition state (TS) and final state (FS) involved in the  $\text{H}_2$  dissociation path on  $\text{Cu}_8/\text{CeO}_2\text{-O}_v$ .

**Figure S6.** The initial state (IS), transition state (TS) and final state (FS) of the direct dissociation of  $\text{CO}_2^*$  into  $\text{CO}^*$  and  $\text{O}^*$  on  $\text{Cu}_8/\text{CeO}_2\text{-O}_v$  and  $\text{Cu}_8/\text{W-CeO}_2\text{-O}_v$ , observed from a top view and side view.

**Figure S7.** Top and side view of the optimized structures for initial state (IS), transition state (TS) and final state (FS) involved in the higher energy pathway of the formate pathway on  $\text{Cu}_8/\text{CeO}_2\text{-O}_v$ .

**Figure S8.** Top and side view of the optimized structures for initial state (IS), transition state (TS) and final state (FS) involved in the generation of  $\text{H}_2\text{O}^*$  before the final step ( $\text{CH}_2\text{OH}^* \rightarrow \text{CH}_3\text{OH}^*$ ) of the RWGS+CO pathway on  $\text{Cu}_8/\text{CeO}_2\text{-O}_v$ .

**Figure S9.** The oxygen vacancy formation step on the  $\text{Cu}_8/\text{W-CeO}_2\text{-O}_v$  surface involves the top view and side view of the initial state (IS), transition state (TS) and final state (FS) of  $\text{CH}_3\text{O}^*$  hydrogenation to  $\text{CH}_3\text{OH}^*$  and  $\text{OH}^*$  hydrogenation to  $\text{H}_2\text{O}^*$ .

**Table S1.** The adsorption energy ( $E_{\text{ads}}$ , eV) and Bader charge (e) of  $\text{Cu}_n$  clusters with different sizes on the most stable adsorption configuration of  $\text{CeO}_2\text{-O}_v$  surface.

**Table S2.** Structural parameters of  $\text{CO}_2$  adsorption on different  $\text{Cu}_8/\text{W-CeO}_2\text{-O}_v$  models.

**Table S3.** DFT Calculated reaction energies ( $E_r/\text{eV}$ ) and activation barriers ( $E_a/\text{eV}$ ) for the direct dissociation of  $\text{CO}_2$  on  $\text{Cu}_8/\text{CeO}_2\text{-O}_v$  and  $\text{Cu}_8/\text{W-CeO}_2\text{-O}_v$  Surface.

**Table S4.** DFT Calculated reaction energies ( $E_r/\text{eV}$ ) and activation barriers ( $E_a/\text{eV}$ ) for elementary reactions involved in methanol synthesis from  $\text{CO}_2$  hydrogenation on  $\text{Cu}_8/\text{CeO}_2\text{-O}_v$

Surface.

**Table S5.** Optimized geometric parameters and adsorption energies of all reaction intermediates on Cu<sub>8</sub>/CeO<sub>2</sub>-O<sub>v</sub>.

**Table S6.** DFT Calculated reaction energies ( $E_r$ /eV) and activation barriers ( $E_a$ /eV) for elementary reactions involved in methanol synthesis from CO<sub>2</sub> hydrogenation on Cu<sub>8</sub>/W-CeO<sub>2</sub>-O<sub>v</sub> Surface.

**Table S7.** The density derived electrostatic and chemical (DDEC) charge analysis for Cu<sub>8</sub>/CeO<sub>2</sub>-O<sub>v</sub>, Cu<sub>8</sub>/W-CeO<sub>2</sub>-O<sub>v</sub>, and H<sub>2</sub>COOH adsorption on both surfaces.

**Table S8.** The density derived electrostatic and chemical (DDEC) charge analysis for Cu<sub>8</sub>/CeO<sub>2</sub>-O<sub>v</sub>, Cu<sub>8</sub>/W-CeO<sub>2</sub>-O<sub>v</sub>, and CO<sub>2</sub> adsorption on both surfaces.

**Table S9.** The ICOHP value of all adsorbed bonds belonging to the most stable H<sub>2</sub>COOH and CO<sub>2</sub> adsorption configuration on Cu<sub>8</sub>/CeO<sub>2</sub>-O<sub>v</sub> and Cu<sub>8</sub>/W-CeO<sub>2</sub>-O<sub>v</sub>.

**Table S10.** TOF values of methanol generated by different catalysts.

### $\text{Cu}_1/\text{CeO}_2\text{-O}_v$

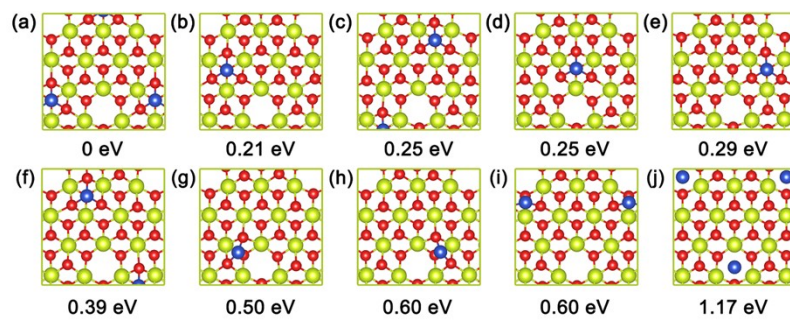

### $\text{Cu}_2/\text{CeO}_2\text{-O}_v$

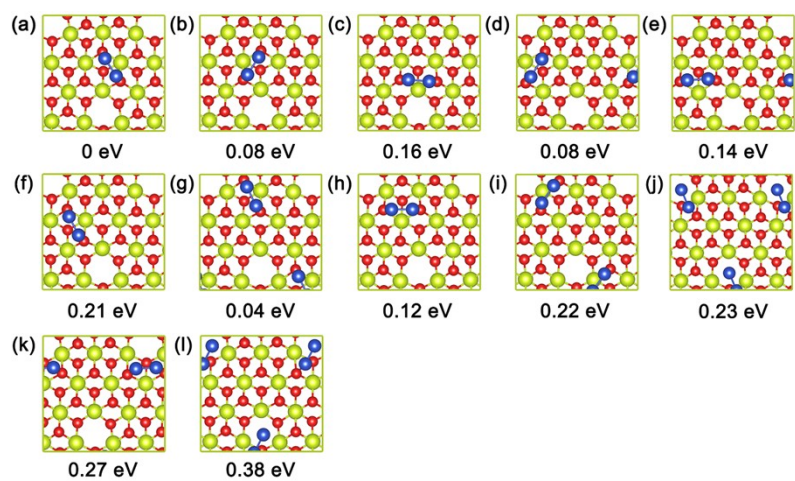

### $\text{Cu}_3/\text{CeO}_2\text{-O}_v$

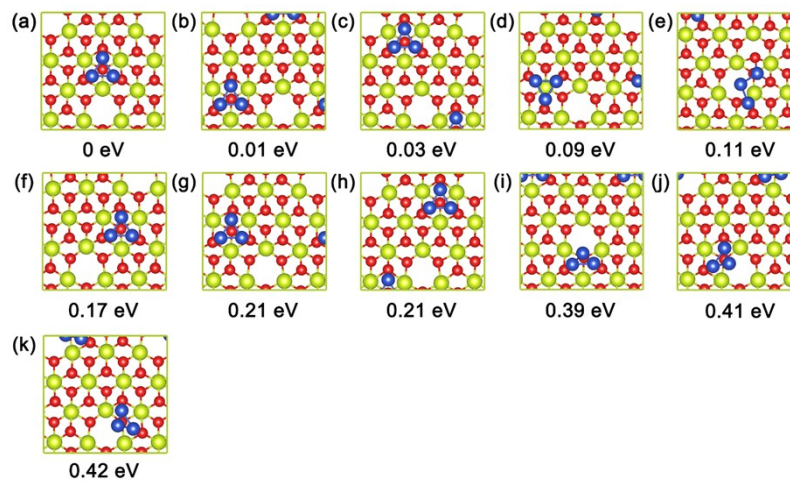

### $\text{Cu}_4/\text{CeO}_2\text{-O}_v$

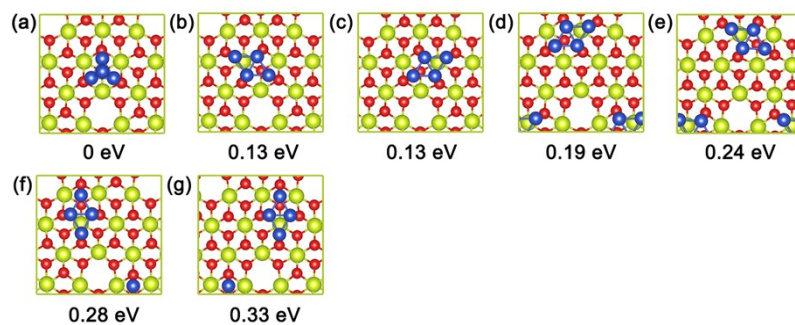

### $\text{Cu}_5/\text{CeO}_2\text{-O}_v$

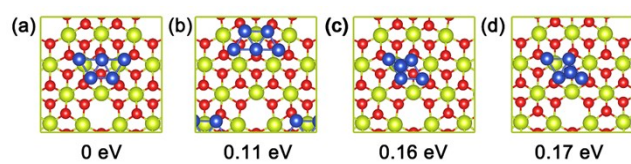

### $\text{Cu}_6/\text{CeO}_2\text{-O}_v$

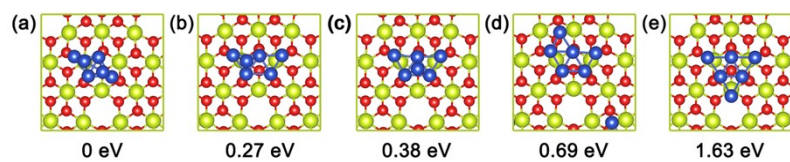

### $\text{Cu}_7/\text{CeO}_2\text{-O}_v$

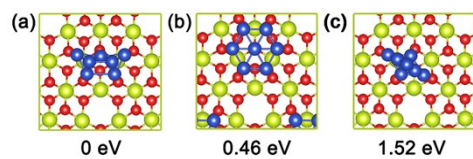

### $\text{Cu}_8/\text{CeO}_2\text{-O}_v$

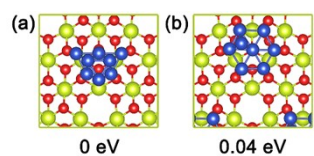

### $\text{Cu}_9/\text{CeO}_2\text{-O}_v$

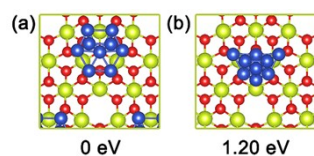

### $\text{Cu}_{10}/\text{CeO}_2\text{-O}_v$

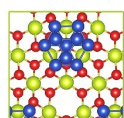

**Figure S1.** The most stable structure of  $\text{Cu}_n$  ( $n = 1-10$ ) clusters anchored at different sites on the surface of  $\text{CeO}_2\text{-O}_v$ , and the values of relative energy are presented at the bottom of the graph. Only a part of the  $\text{CeO}_2\text{-O}_v$  surface is displayed, and Ce, Cu, and O atoms are denoted by cyan, blue and red spheres, respectively.

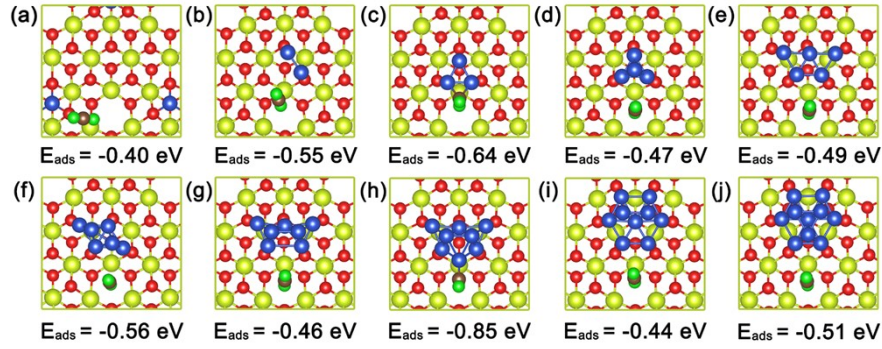

**Figure S2.** Most stable configuration for the chemisorption of  $\text{CO}_2$  molecules at the  $\text{Cu}_n/\text{CeO}_2\text{-O}_v$  interface.

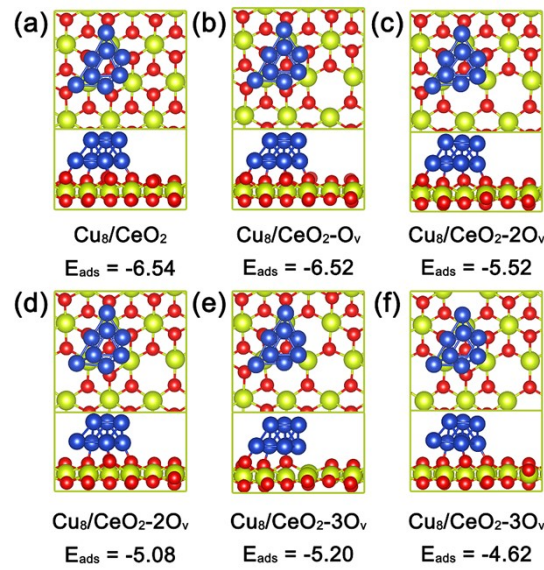

**Figure S3.** Geometric structure and adsorption energy of  $\text{Cu}_8$  on stoichiometric and partially reduced  $\text{CeO}_2$  surfaces.  $n$  in  $\text{Cu}_8/\text{CeO}_2\text{-}n\text{O}_v$  is some surface oxygen vacancies in  $\text{CeO}_2$  support.  $\text{Cu}_8$  adsorption energy ( $E_{\text{ads}}$ ) appears at the bottom, and the unit of adsorption energy is eV.

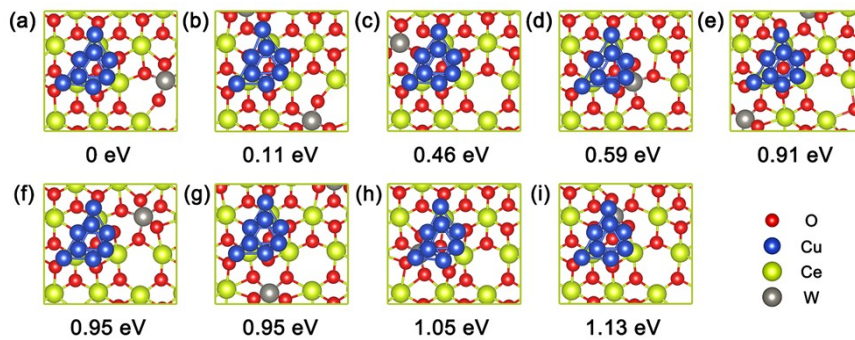

**Figure S4.** The nine most stable geometries of W-doping on  $\text{Cu}_8/\text{W-CeO}_2\text{-O}_v$  (a-i). The values of relative energy are presented at the bottom of the graph.

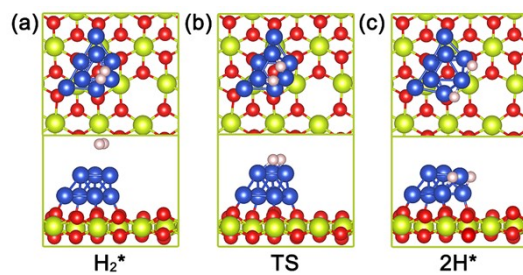

**Figure S5.** Top and side view of the optimized structures of the initial state (IS), transition state (TS) and final state (FS) involved in the H<sub>2</sub> dissociation path on Cu<sub>8</sub>/CeO<sub>2</sub>-O<sub>v</sub>.

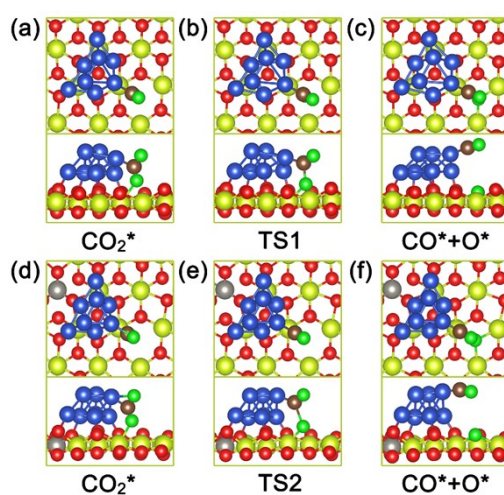

**Figure S6.** The initial state (IS), transition state (TS) and final state (FS) of the direct dissociation of CO<sub>2</sub>\* into CO\* and O\* on Cu<sub>8</sub>/CeO<sub>2</sub>-O<sub>v</sub> and Cu<sub>8</sub>/W-CeO<sub>2</sub>-O<sub>v</sub>, observed from a top view and side view.

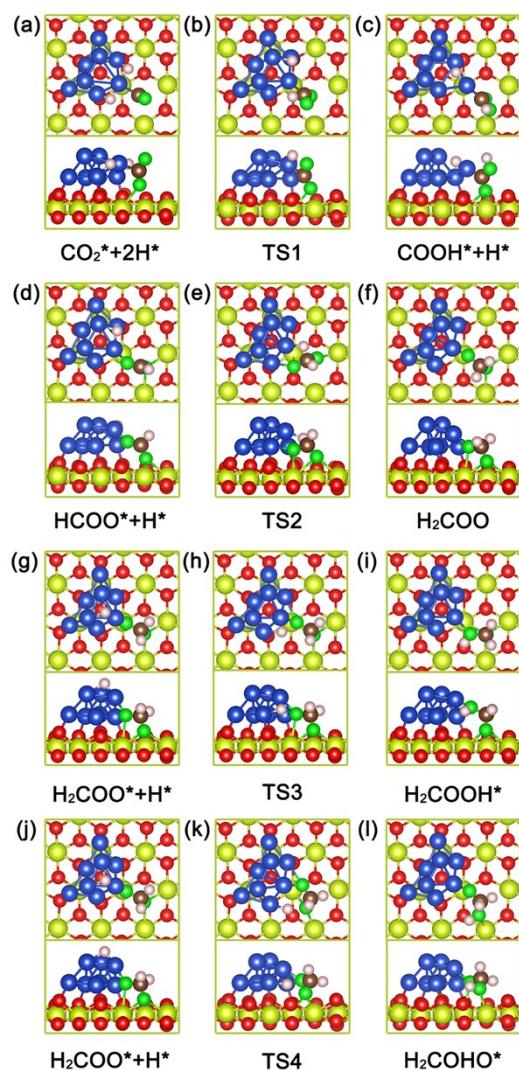

**Figure S7.** Top and side view of the optimized structures for initial state (IS), transition state (TS) and final state (FS) involved in the higher energy pathway of the formate pathway on  $\text{Cu}_8/\text{CeO}_2\text{-O}_v$ .

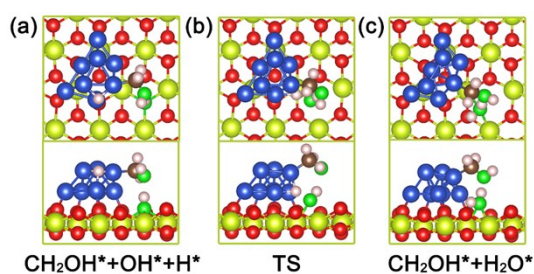

**Figure S8.** Top and side view of the optimized structures for initial state (IS), transition state (TS) and final state (FS) involved in the generation of  $\text{H}_2\text{O}^*$  before the final step ( $\text{CH}_2\text{OH}^* \rightarrow \text{CH}_3\text{OH}^*$ ) of the RWGS + CO pathway on  $\text{Cu}_8/\text{CeO}_2\text{-O}_v$ .



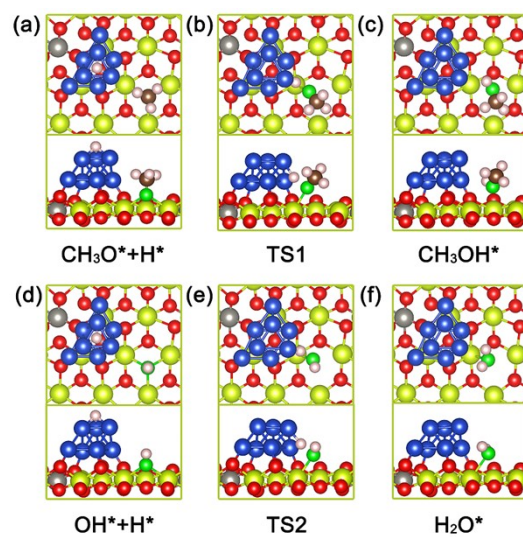

**Figure S9.** The oxygen vacancy formation step on the  $\text{Cu}_8/\text{W-CeO}_2\text{-O}_v$  surface involves the top view and side view of the initial state (IS), transition state (TS) and final state (FS) of  $\text{CH}_3\text{O}^*$  hydrogenation to  $\text{CH}_3\text{OH}^*$  and  $\text{OH}^*$  hydrogenation to  $\text{H}_2\text{O}^*$ .

**Table S1.** The adsorption energy ( $E_{\text{ads}}$ , eV) and Bader charge (e) of  $\text{Cu}_n$  clusters with different sizes on the most stable adsorption configuration of  $\text{CeO}_2\text{-O}_v$  surface.

| System                                   | $E_{\text{ads}}$ | DDEC charge of Cu atom                                      | DDEC charge of $\text{Cu}_n$ clusters |
|------------------------------------------|------------------|-------------------------------------------------------------|---------------------------------------|
| $\text{Cu}_1/\text{CeO}_2\text{-O}_v$    | -3.02            | +0.49                                                       | +0.49                                 |
| $\text{Cu}_2/\text{CeO}_2\text{-O}_v$    | -2.59            | +0.11 +0.10                                                 | +0.21                                 |
| $\text{Cu}_3/\text{CeO}_2\text{-O}_v$    | -4.90            | +0.06 +0.01 +0.01                                           | +0.08                                 |
| $\text{Cu}_4/\text{CeO}_2\text{-O}_v$    | -5.47            | +0.17 +0.15 +0.14 +0.10                                     | +0.56                                 |
| $\text{Cu}_5/\text{CeO}_2\text{-O}_v$    | -5.79            | -0.06 +0.08 +0.07 +0.29 +0.32                               | +0.70                                 |
| $\text{Cu}_6/\text{CeO}_2\text{-O}_v$    | -6.09            | +0.14 +0.09 +0.17 +0.07 -0.03 -0.01                         | +0.43                                 |
| $\text{Cu}_7/\text{CeO}_2\text{-O}_v$    | -6.66            | +0.16 +0.19 +0.10 +0.16 -0.02 +0.01                         | +0.60                                 |
| $\text{Cu}_8/\text{CeO}_2\text{-O}_v$    | -6.52            | +0.11 +0.13 +0.06 +0.11 +0.13 -0.04 -0.04 -0.09             | +0.37                                 |
| $\text{Cu}_9/\text{CeO}_2\text{-O}_v$    | -7.87            | +0.12 -0.07 +0.12 -0.02 -0.01 +0.13 +0.08 +0.08 +0.14       | +0.57                                 |
| $\text{Cu}_{10}/\text{CeO}_2\text{-O}_v$ | -8.76            | +0.16 +0.04 +0.15 -0.01 -0.01 +0.16 +0.18 +0.16 +0.16 -0.03 | +0.96                                 |

**Table S2.** Structural parameters of  $\text{CO}_2$  adsorption on  $\text{Cu}_8/\text{CeO}_2\text{-O}_v$  and  $\text{Cu}_8/\text{W-CeO}_2\text{-O}_v$  models.

| Sample                                     | $d(\text{Cu-C})$ | $d(\text{Ce-O}_{\text{down}})$ | $d(\text{C-O}_{\text{up}})$ | $d(\text{C-O}_{\text{down}})$ |
|--------------------------------------------|------------------|--------------------------------|-----------------------------|-------------------------------|
| $\text{Cu}_8/\text{CeO}_2\text{-O}_v$      | 2.01             | 2.60                           | 1.22                        | 1.28                          |
| a- $\text{Cu}_8/\text{W-CeO}_2\text{-O}_v$ | 2.03             | 2.59                           | 1.22                        | 1.26                          |
| b- $\text{Cu}_8/\text{W-CeO}_2\text{-O}_v$ | --               | --                             | 1.17                        | 1.19                          |
| c- $\text{Cu}_8/\text{W-CeO}_2\text{-O}_v$ | 2.03             | 2.65                           | 1.22                        | 1.25                          |

**Table S3.** DFT Calculated reaction energies ( $E_r$ /eV) and activation barriers ( $E_a$ /eV) for the direct dissociation of  $\text{CO}_2$  on  $\text{Cu}_8/\text{CeO}_2\text{-O}_v$  and  $\text{Cu}_8/\text{W-CeO}_2\text{-O}_v$  Surface.

| Sample                                  | reaction                                                 | $E_r$ (eV) | $E_a$ (eV) |
|-----------------------------------------|----------------------------------------------------------|------------|------------|
| $\text{Cu}_8/\text{CeO}_2\text{-O}_v$   | $\text{CO}_2^* + * \rightarrow \text{CO}^* + \text{O}^*$ | +0.50      | 1.54       |
| $\text{Cu}_8/\text{W-CeO}_2\text{-O}_v$ | $\text{CO}_2^* + * \rightarrow \text{CO}^* + \text{O}^*$ | +0.59      | 2.01       |

**Table S4.** DFT Calculated reaction energies ( $E_r$ /eV) and activation barriers ( $E_a$ /eV) for elementary reactions involved in methanol synthesis from CO<sub>2</sub> hydrogenation on Cu<sub>8</sub>/CeO<sub>2</sub>-O<sub>v</sub> Surface.

| Step            | reaction                                                                              | $E_r$ (eV) | $E_a$ (eV) |
|-----------------|---------------------------------------------------------------------------------------|------------|------------|
| R <sub>1</sub>  | CO <sub>2</sub> * + 2H* → HCOO* + H*                                                  | -1.29      | 0.02       |
| R <sub>2</sub>  | CO <sub>2</sub> * + 2H* → COOH* + H*                                                  | -0.70      | 1.87       |
| R <sub>3</sub>  | HCOO* + H* → H <sub>2</sub> COO* + *                                                  | +0.90      | 1.62       |
| R <sub>4</sub>  | HCOO* + H* → HCOOH* + *                                                               | +1.04      | 1.08       |
| R <sub>5</sub>  | HCOOH* + H* → H <sub>2</sub> COOH* + *                                                | -0.85      | 0.19       |
| R <sub>6</sub>  | H <sub>2</sub> COO* + H* → H <sub>2</sub> COOH* + *                                   | +0.58      | 1.78       |
| R <sub>7</sub>  | H <sub>2</sub> COO* + H* → H <sub>2</sub> COHO* + *                                   | +1.03      | 2.93       |
| R <sub>8</sub>  | H <sub>2</sub> COOH* + H* → H <sub>2</sub> CO* + H <sub>2</sub> O*                    | +1.12      | 1.51       |
| R <sub>9</sub>  | H <sub>2</sub> CO* + H <sub>2</sub> O* → H <sub>2</sub> CO* + H <sub>2</sub> O(g) + * | +0.06      | --         |
| R <sub>10</sub> | H <sub>2</sub> CO* + H* → H <sub>3</sub> CO* + *                                      | -0.70      | 0.55       |
| R <sub>11</sub> | H <sub>3</sub> CO* + H* → CH <sub>3</sub> OH* + *                                     | +0.40      | 1.18       |
| R <sub>12</sub> | CH <sub>3</sub> OH* → CH <sub>3</sub> OH(g) + *                                       | +1.27      | --         |
| R <sub>13</sub> | CO <sub>2</sub> * + 2H* → CO* + OH*                                                   | -0.69      | 1.45       |
| R <sub>14</sub> | CO* + OH* + H* → CHO* + OH* + *                                                       | +0.19      | 0.96       |
| R <sub>15</sub> | CO* + OH* + H* → COH* + OH* + *                                                       | +1.73      | --         |
| R <sub>16</sub> | CO* + OH* + H* → CO* + H <sub>2</sub> O* + *                                          | +0.63      | 1.23       |
| R <sub>17</sub> | CHO* + OH* + H* → CH <sub>2</sub> O* + OH* + *                                        | +0.14      | 0.84       |
| R <sub>18</sub> | CHO* + OH* + H* → CH <sub>2</sub> O* + H <sub>2</sub> O* + *                          | +0.42      | 1.58       |
| R <sub>19</sub> | CH <sub>2</sub> O* + OH* + H* → CH <sub>2</sub> OH* + OH* + *                         | -0.45      | 1.35       |
| R <sub>20</sub> | CH <sub>2</sub> O* + OH* + H* → CH <sub>3</sub> O* + OH* + *                          | +0.14      | --         |
| R <sub>21</sub> | CH <sub>2</sub> OH* + OH* + H* → CH <sub>3</sub> OH* + OH* + *                        | -0.25      | 1.25       |
| R <sub>22</sub> | CH <sub>2</sub> OH* + OH* + H* → CH <sub>2</sub> OH* + H <sub>2</sub> O* + *          | 0.25       | 1.62       |
| R <sub>23</sub> | OH* + H* → H <sub>2</sub> O* + *                                                      | +0.48      | 1.19       |
| R <sub>24</sub> | CO <sub>3</sub> * + 2H* → HCO <sub>3</sub> * + H*                                     | -0.09      | 0.87       |
| R <sub>25</sub> | HCO <sub>3</sub> * + H* → H <sub>2</sub> CO <sub>3</sub> * + *                        | +0.92      | 1.07       |
| R <sub>26</sub> | H <sub>2</sub> CO <sub>3</sub> * → H <sub>2</sub> CO <sub>3</sub> (g) + *             | +1.81      | --         |

**Table S5.** Optimized geometric parameters and adsorption energies of all reaction intermediates on Cu<sub>8</sub>/CeO<sub>2</sub>-O<sub>v</sub>.  $\eta$ -X, X<sub>bl</sub>, X<sub>a</sub> represent the bond length (unit: Å) of the substrate-the nearest adsorbate, the internal bond length (unit: Å) of the adsorbed species, and the internal bond angle (unit: °) of the adsorbed species, respectively.  $E_{\text{ads}}$  represents the adsorption energy (unit: eV) of the reaction intermediate on the substrate. H<sup>OH</sup> represents reduction of hydrogen in OH on CeO<sub>2</sub> surface.

| species                                 | $\eta$ -X          | d( $\eta$ -X) | X <sub>bl</sub>     | d(X <sub>bl</sub> ) | X <sub>a</sub>       | angle | $E_{\text{ads}}$ |
|-----------------------------------------|--------------------|---------------|---------------------|---------------------|----------------------|-------|------------------|
| <b>H_Cu</b>                             | Cu-H               | 1.624         |                     |                     |                      |       | -0.30            |
| <b>H_CeO<sub>2</sub></b>                | O-H                | 0.975         |                     |                     |                      |       | -1.43            |
| <b>OH</b>                               | Ce-O               | 2.593         | O-H                 | 0.975               |                      |       | -4.52            |
| <b>H<sub>2</sub>O_Cu</b>                | Cu-O               | 2.021         | O-H                 | 1.001               | ∠HOH                 | 105.9 | -0.06            |
| <b>H<sub>2</sub>O_CeO<sub>2</sub></b>   | Ce-O               | 2.813         | O-H                 | 0.986               | ∠HOH                 | 100.5 | -1.01            |
| <b>CO<sub>2</sub></b>                   | Cu-C               | 2.008         | C-O <sub>up</sub>   | 1.224               | ∠OCO                 | 132.6 | -0.85            |
|                                         | Ce-O               | 2.599         | C-O <sub>down</sub> | 1.277               |                      |       |                  |
| <b>HCOO</b>                             | Cu-O               | 2.002         | C-H                 | 1.111               | ∠OCO                 | 123.3 | -4.54            |
|                                         | Ce-O               | 2.806         | C-O <sub>up</sub>   | 1.260               | ∠HCO <sub>up</sub>   | 119.2 |                  |
|                                         |                    |               | C-O <sub>down</sub> | 1.283               | ∠HCO <sub>down</sub> | 117.5 |                  |
| <b>COOH</b>                             | Cu-O               | 1.912         | O-H                 | 0.978               | ∠OCO                 | 112.2 | -3.56            |
|                                         | Ce-O               | 2.762         | C-O <sub>up</sub>   | 1.360               | ∠COH                 | 108.0 |                  |
|                                         |                    |               | C-O <sub>down</sub> | 1.269               |                      |       |                  |
| <b>H<sub>2</sub>COO</b>                 | Cu-O               | 1.870         | C-H                 | 1.113               | ∠HCH                 | 108.5 | -1.56            |
|                                         | Ce-O               | 2.635         | C-O <sub>up</sub>   | 1.423               | ∠OCO                 | 108.7 |                  |
|                                         |                    | 2.629         | C-O <sub>down</sub> | 1.410               |                      |       |                  |
| <b>HCOOH</b>                            | Ce-O               | 2.733         | C-H                 | 1.105               | ∠COH                 | 109.5 | -1.39            |
|                                         |                    |               | O-H                 | 1.016               | ∠HCO                 | 114.6 |                  |
|                                         |                    |               | C-O                 | 1.284               | ∠OCO                 | 120.6 |                  |
| <b>H<sub>2</sub>COOH</b>                | Cu-O               | 1.974         | C-H                 | 1.107               | ∠HCH                 | 110.3 | -3.63            |
|                                         | Ce-O               | 2.723         | O-H                 | 0.985               | ∠HOC                 | 106.9 |                  |
|                                         |                    |               | C-O <sub>up</sub>   | 1.517               | ∠OCO                 | 111.3 |                  |
|                                         |                    |               | C-O <sub>down</sub> | 1.356               |                      |       |                  |
| <b>H<sub>2</sub>CO</b>                  | Cu-C               | 2.014         | C-H                 | 1.110               | ∠HCH                 | 112.9 | -1.66            |
|                                         | Ce-O               | 2.699         | C-O                 | 1.350               | ∠HCO                 | 115.1 |                  |
| <b>CH<sub>2</sub>O</b>                  | Cu-C               | 2.132         | C-H                 | 1.119               | ∠HCH                 | 115.8 | -0.14            |
|                                         | H <sup>OH</sup> -O |               | C-O                 | 1.259               | ∠HCO                 | 120.2 |                  |
| <b>CH<sub>3</sub>O</b>                  | Ce-O               | 2.560         | C-H                 | 1.111               | ∠HCH                 | 106.9 | -3.50            |
|                                         |                    |               | C-O                 | 1.417               | ∠HCO                 | 112.0 |                  |
| <b>CH<sub>3</sub>OH_CeO<sub>2</sub></b> | Ce-O               | 2.913         | C-H                 | 1.101               | ∠HCH                 | 110.6 | -1.27            |
|                                         |                    |               | C-O                 | 1.452               | ∠HCO                 | 110.7 |                  |
|                                         |                    |               | O-H                 | 0.992               | ∠HOC                 | 107.0 |                  |
| <b>CH<sub>3</sub>OH_Cu</b>              | H <sup>OH</sup> -O | 1.908         | C-H                 | 1.104               | ∠HCH                 | 109.0 | -0.09            |
|                                         |                    |               | C-O                 | 1.430               | ∠HCO                 | 106.8 |                  |
|                                         |                    |               | O-H                 | 0.974               | ∠HOC                 | 109.1 |                  |
| <b>CO</b>                               | Cu-C               | 1.853         | C-O                 | 1.153               |                      |       | -0.97            |

|                                    |                    |       |                  |       |                                         |       |        |
|------------------------------------|--------------------|-------|------------------|-------|-----------------------------------------|-------|--------|
| <b>CHO</b>                         | Cu-C               | 1.913 | C-H              | 1.130 | $\angle$ HCO                            | 116.8 | -1.95  |
|                                    | H <sup>OH</sup> -O | 1.927 | C-O              | 1.223 |                                         |       |        |
| <b>CH<sub>2</sub>OH</b>            | Cu-C               | 1.940 | C-H              | 1.105 | $\angle$ HCH                            | 109.4 | -4.39  |
|                                    | H <sup>OH</sup> -O | 1.842 | C-O              | 1.445 | $\angle$ HCO                            | 110.3 |        |
|                                    |                    |       | O-H              | 0.975 | $\angle$ HOC                            | 108.3 |        |
| <b>CO<sub>3</sub></b>              | Ce-O               | 2.601 | C-O <sub>a</sub> | 1.286 | $\angle$ O <sub>a</sub> CO <sub>b</sub> | 125.7 | -13.81 |
|                                    | Cu-O               | 2.076 | C-O <sub>b</sub> | 1.277 | $\angle$ O <sub>b</sub> CO <sub>c</sub> | 118.5 |        |
|                                    |                    |       | C-O <sub>c</sub> | 1.348 | $\angle$ O <sub>a</sub> CO <sub>c</sub> | 115.3 |        |
| <b>HCO<sub>3</sub></b>             | Ce-O               | 2.733 | O-H              | 0.980 | $\angle$ HO <sub>a</sub> C              | 106.8 | -7.99  |
|                                    |                    |       | C-O <sub>a</sub> | 1.358 | $\angle$ O <sub>a</sub> CO <sub>b</sub> | 120.1 |        |
|                                    |                    |       | C-O <sub>b</sub> | 1.262 | $\angle$ O <sub>b</sub> CO <sub>c</sub> | 125.0 |        |
|                                    |                    |       | C-O <sub>c</sub> | 1.290 | $\angle$ O <sub>a</sub> CO <sub>c</sub> | 114.8 |        |
| <b>H<sub>2</sub>CO<sub>3</sub></b> | Ce-O               | 2.740 | O-H              | 1.020 | $\angle$ HO <sub>a</sub> C              | 111.1 | -1.81  |
|                                    |                    |       | C-O <sub>a</sub> | 1.324 | $\angle$ O <sub>a</sub> CO <sub>b</sub> | 119.1 |        |
|                                    |                    |       | C-O <sub>b</sub> | 1.346 | $\angle$ O <sub>b</sub> CO <sub>c</sub> | 119.9 |        |
|                                    |                    |       | C-O <sub>c</sub> | 1.240 | $\angle$ O <sub>a</sub> CO <sub>c</sub> | 121.0 |        |

---

**Table S6.** DFT Calculated reaction energies ( $E_r$ /eV) and activation barriers ( $E_a$ /eV) for elementary reactions involved in methanol synthesis from CO<sub>2</sub> hydrogenation on Cu<sub>8</sub>/W-CeO<sub>2</sub>-O<sub>v</sub> Surface.

| Step           | reaction                                                           | $E_r$ (eV) | $E_a$ (eV) |
|----------------|--------------------------------------------------------------------|------------|------------|
| R <sub>1</sub> | HCOO* + H* → HCOOH* + *                                            | +0.88      | 1.06       |
| R <sub>2</sub> | H <sub>2</sub> COOH* + H* → H <sub>2</sub> CO* + H <sub>2</sub> O* | +0.81      | 1.01       |
| R <sub>3</sub> | CH <sub>3</sub> O* + H* → CH <sub>3</sub> OH* + *                  | +0.31      | 1.22       |
| R <sub>4</sub> | CO <sub>2</sub> * + H* → CO* + OH*                                 | -0.13      | 1.99       |
| R <sub>5</sub> | OH* + H* → H <sub>2</sub> O* + *                                   | +0.44      | 1.39       |

**Table S7.** The density derived electrostatic and chemical (DDEC) charge analysis for Cu<sub>8</sub>/CeO<sub>2</sub>-O<sub>v</sub>, Cu<sub>8</sub>/W-CeO<sub>2</sub>-O<sub>v</sub>, and H<sub>2</sub>COOH adsorption on both surfaces.

|                                                     | C     | O <sub>a</sub> | O <sub>b</sub> | H <sub>a</sub> | H <sub>b</sub> | H <sub>c</sub> | H <sub>2</sub> COOH (total) |
|-----------------------------------------------------|-------|----------------|----------------|----------------|----------------|----------------|-----------------------------|
| Cu <sub>8</sub> /CeO <sub>2</sub> -O <sub>v</sub>   | +0.30 | -0.46          | -0.81          | 0.03           | 0.05           | 0.36           | -0.53                       |
| Cu <sub>8</sub> /W-CeO <sub>2</sub> -O <sub>v</sub> | +0.30 | -0.51          | -0.84          | 0.02           | 0.04           | 0.33           | -0.66                       |

**Table S8.** The density derived electrostatic and chemical (DDEC) charge analysis for Cu<sub>8</sub>/CeO<sub>2</sub>-O<sub>v</sub>, Cu<sub>8</sub>/W-CeO<sub>2</sub>-O<sub>v</sub>, and CO<sub>2</sub> adsorption on both surfaces.

|                                                     | C     | O <sub>a</sub> | O <sub>b</sub> | CO <sub>2</sub> (total) |
|-----------------------------------------------------|-------|----------------|----------------|-------------------------|
| Cu <sub>8</sub> /CeO <sub>2</sub> -O <sub>v</sub>   | +0.46 | -0.38          | -0.63          | -0.55                   |
| Cu <sub>8</sub> /W-CeO <sub>2</sub> -O <sub>v</sub> | +0.49 | -0.38          | -0.57          | -0.46                   |

**Table S9.** The ICOHP value of all adsorbed bonds belonging to the most stable H<sub>2</sub>COOH and CO<sub>2</sub> adsorption configuration on Cu<sub>8</sub>/CeO<sub>2</sub>-O<sub>v</sub> and Cu<sub>8</sub>/W-CeO<sub>2</sub>-O<sub>v</sub>.

| H <sub>2</sub> COOH                                 | Ce-O <sub>down</sub> | C-O <sub>up</sub>   | Cu-O <sub>up</sub> | --                 |
|-----------------------------------------------------|----------------------|---------------------|--------------------|--------------------|
| Cu <sub>8</sub> /CeO <sub>2</sub> -O <sub>v</sub>   | -0.70                | -4.03               | -0.74              | --                 |
| Cu <sub>8</sub> /W-CeO <sub>2</sub> -O <sub>v</sub> | -0.84                | -4.65               | -0.16              | --                 |
| CO <sub>2</sub>                                     | Ce-O <sub>down</sub> | C-O <sub>down</sub> | Cu-C               | Cu-O <sub>up</sub> |
| Cu <sub>8</sub> /CeO <sub>2</sub> -O <sub>v</sub>   | -1.34                | -6.35               | -1.06              | -0.04              |
| Cu <sub>8</sub> /W-CeO <sub>2</sub> -O <sub>v</sub> | -1.10                | -6.77               | -1.00              | -0.07              |

**Table S10.** TOF values of methanol generated by different catalysts.

| Catalyst                                             | T/K     | TOF/s <sup>-1</sup>                    | Reference |
|------------------------------------------------------|---------|----------------------------------------|-----------|
| Cu <sub>8</sub> /CeO <sub>2</sub> -O <sub>v</sub>    | 523     | 7.1×10 <sup>-6</sup>                   | this work |
| Cu <sub>8</sub> /W-CeO <sub>2</sub> -O <sub>v</sub>  | 523     | 7.1×10 <sup>-5</sup>                   | this work |
| In <sub>2</sub> O <sub>3</sub> -O <sub>v</sub> (110) | 473~573 | 1×10 <sup>-5</sup> ~1×10 <sup>-1</sup> | [1]       |
| In <sub>2</sub> O <sub>3</sub> -O <sub>v</sub> (111) | 473~573 | 1×10 <sup>-2</sup> ~1                  | [1]       |
| Zr1-In <sub>2</sub> O <sub>3</sub> (110)             | 550     | 1×10 <sup>-4</sup>                     | [2]       |
| In <sub>2</sub> O <sub>3</sub> (110)                 | 550     | 1×10 <sup>-5</sup>                     | [2]       |
| Zr3-In <sub>2</sub> O <sub>3</sub> (110)             | 550     | 1×10 <sup>-8</sup>                     | [2]       |
| Pt <sub>8</sub> /In <sub>2</sub> O <sub>3</sub>      | 423~580 | 1×10 <sup>-9</sup> ~1×10 <sup>-2</sup> | [3]       |
| Ga <sub>3</sub> /Ni <sub>5</sub>                     | 500     | 3.26×10 <sup>-14</sup>                 | [4]       |
| Cu (211)                                             | 523     | 2.73×10 <sup>-7</sup>                  | [5]       |
| Cu (211) <sub>single-Zn-step</sub>                   | 523     | 3.07×10 <sup>-5</sup>                  | [5]       |

[1] Z. Zhou, B. Qin, S. Li, Y. Sun, *Phys. Chem. Chem. Phys.*, 2021, **23**, 1888–1895.

[2] K. Li, Z. Wei, Q. Chang, S. Li, *Phys. Chem. Chem. Phys.*, 2023, **25**, 14961–14968.

[3] X. Wang, J. Pan, H. Wei, W. Li, J. Zhao, Z. Hu, *J. Phys. Chem. C*, 2022, **126**, 1761–1769.

[4] Q. Tang, Z. Shen, C.K. Russell, M. Fan, *J. Phys. Chem. C*, 2018, **122**, 315–330.

[5] D.Y. Jo, M.W. Lee, H.C. Ham, K.-Y. Lee, *J. Catal.*, 2019, **373**, 336–350.
